# Supplementary material
Source: MDPI journal article supplement (https://www.mdpi.com/2073-4344/12/9/957)
Supplement: s1 [file s1]

## Supporting Information

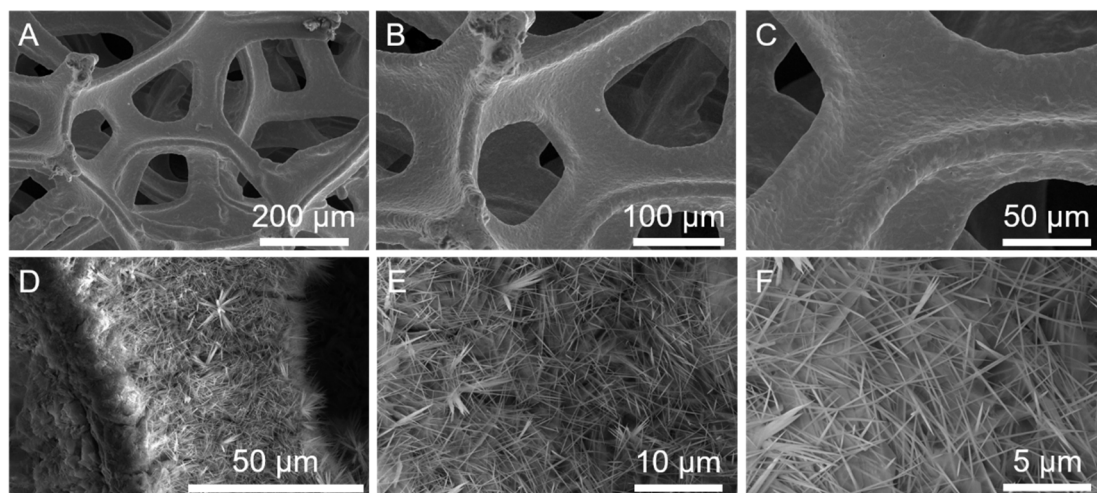

**Figure S1.** SEM images of different catalysts. (A-C) Nickel foam. (D-F) Fe-Co-O precursor/NF.

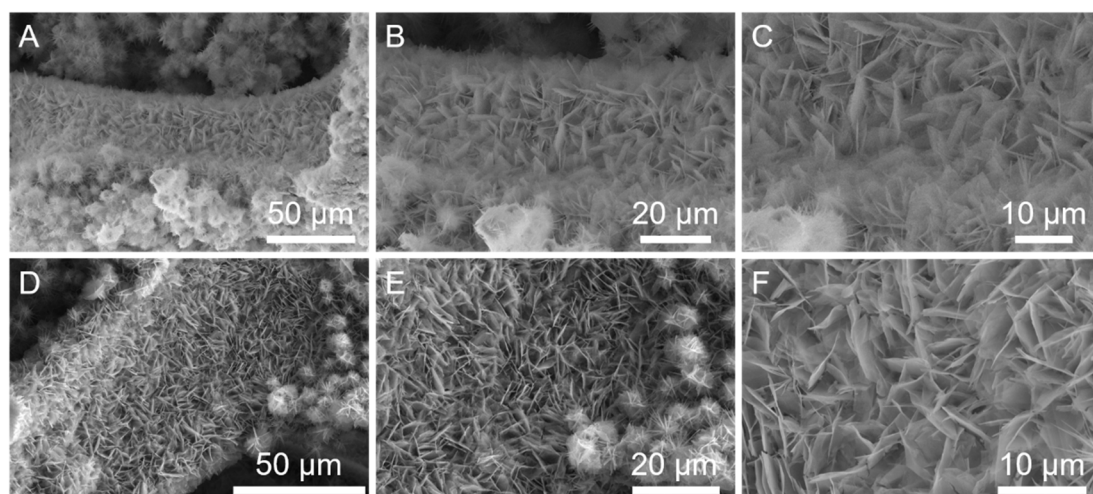

**Figure S2.** SEM images of different catalysts. (A-C) Fe-Co-O@CN/NF. (D-F) Fe-Co<sub>2</sub>P/NPC/NF.

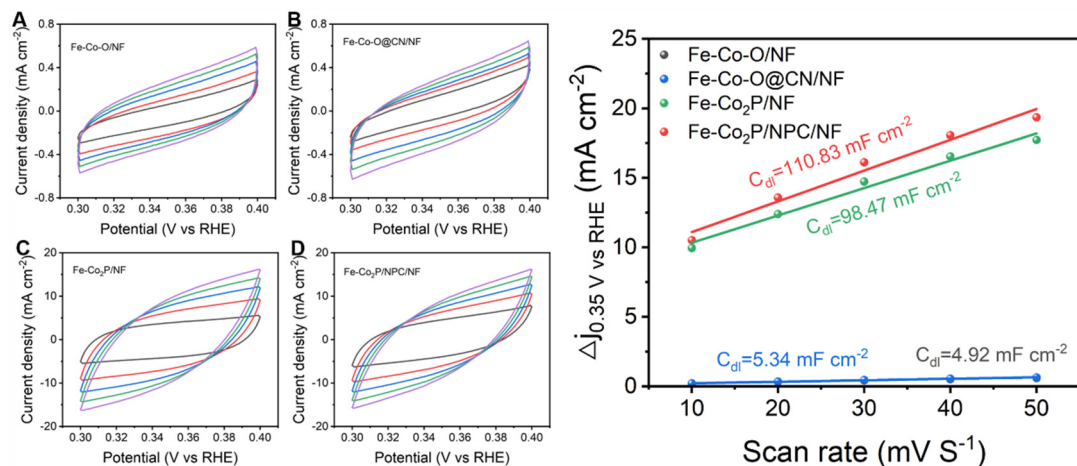

**Figure S3.** Cyclic voltammograms (CV) curves of different catalysts between 0.3 to 0.4 V vs RHE at five different scan rates (10, 20, 30, 40, and 50 mV s<sup>-1</sup>) and electrochemical double layer capacitances ( $C_{dl}$ ). (A) Fe-Co-O/NF. (B) Fe-Co-O@CN/NF. (C) Fe-Co<sub>2</sub>P/NF. (D) Fe-Co<sub>2</sub>P/NPC/NF. (E) The current density variation ( $\Delta j = j_a - j_c$ ) at the potential of 0.35 V vs RHE with varied scan rates fitted to estimate the electrochemical double layer capacitances ( $C_{dl}$ ).

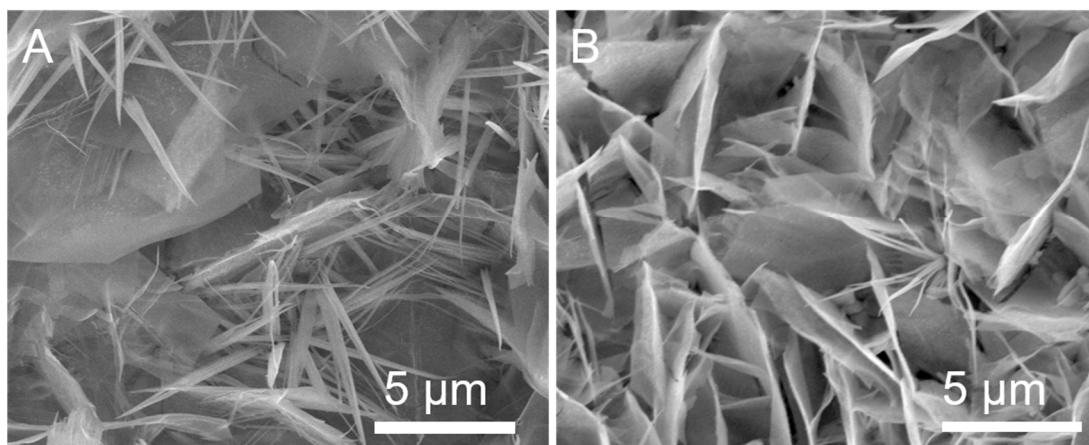

**Figure S4.** (A) SEM patterns of Fe-Co<sub>2</sub>P/NPC/NF before the HER stability test. (B) after the HER stability test.

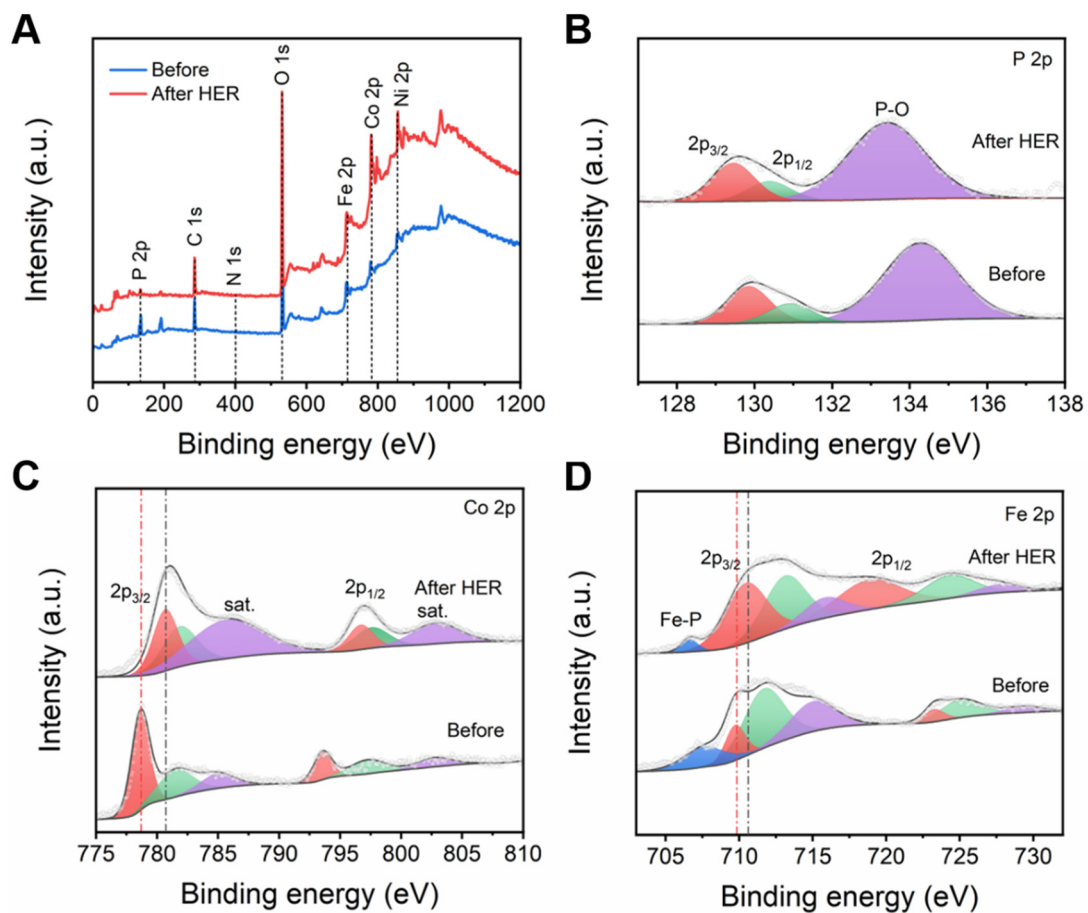

**Figure S5.** (A) XPS scanning full spectrum of Fe-Co<sub>2</sub>P/NPC/NF before and after HER stability test. (B) P 2p, (C) Co 2p and (D) Fe 2p.

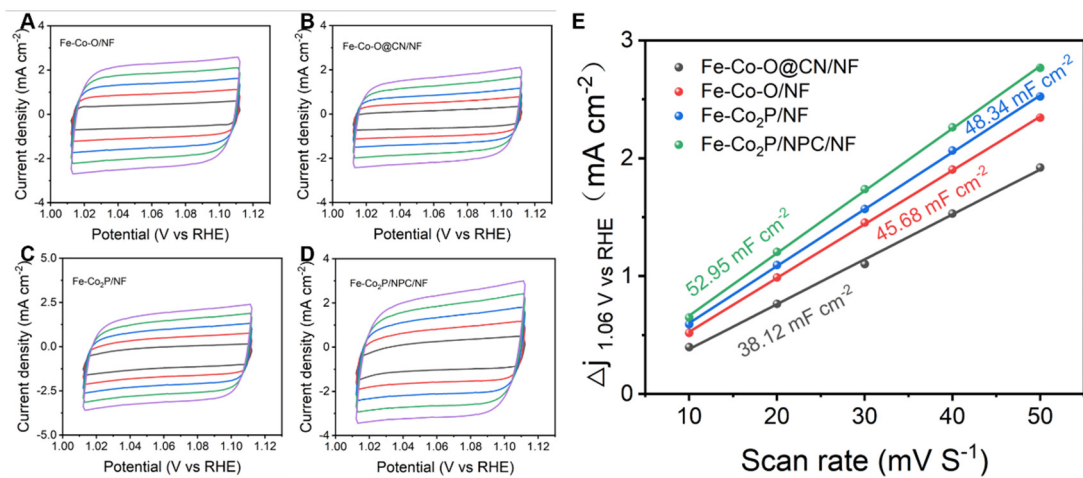

**Figure S6.** Cyclic voltammograms (CV) curves of different catalysts between 1.01 to 1.11 V vs RHE at five different scan rates (10, 20, 30, 40, and 50  $\text{mV s}^{-1}$ ) and electrochemical double layer capacitances ( $C_{dl}$ ). (A) Fe-Co-O/NF. (B) Fe-Co-O@CN/NF. (C) Fe-Co<sub>2</sub>P/NF. (D) Fe-Co<sub>2</sub>P/NPC/NF. (E) The current density variation ( $\Delta j = j_a - j_c$ ) at the potential of 1.06 V vs RHE with varied scan rates fitted to estimate the electrochemical double layer capacitances ( $C_{dl}$ ).

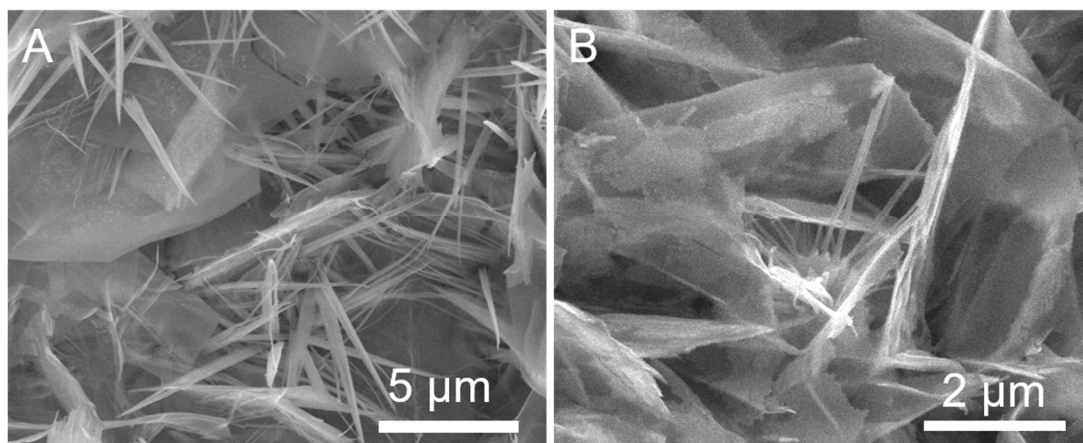

**Figure S7.** (A) SEM patterns of Fe-Co<sub>2</sub>P/NPC/NF before the OER stability test, (B) after the OER stability test.

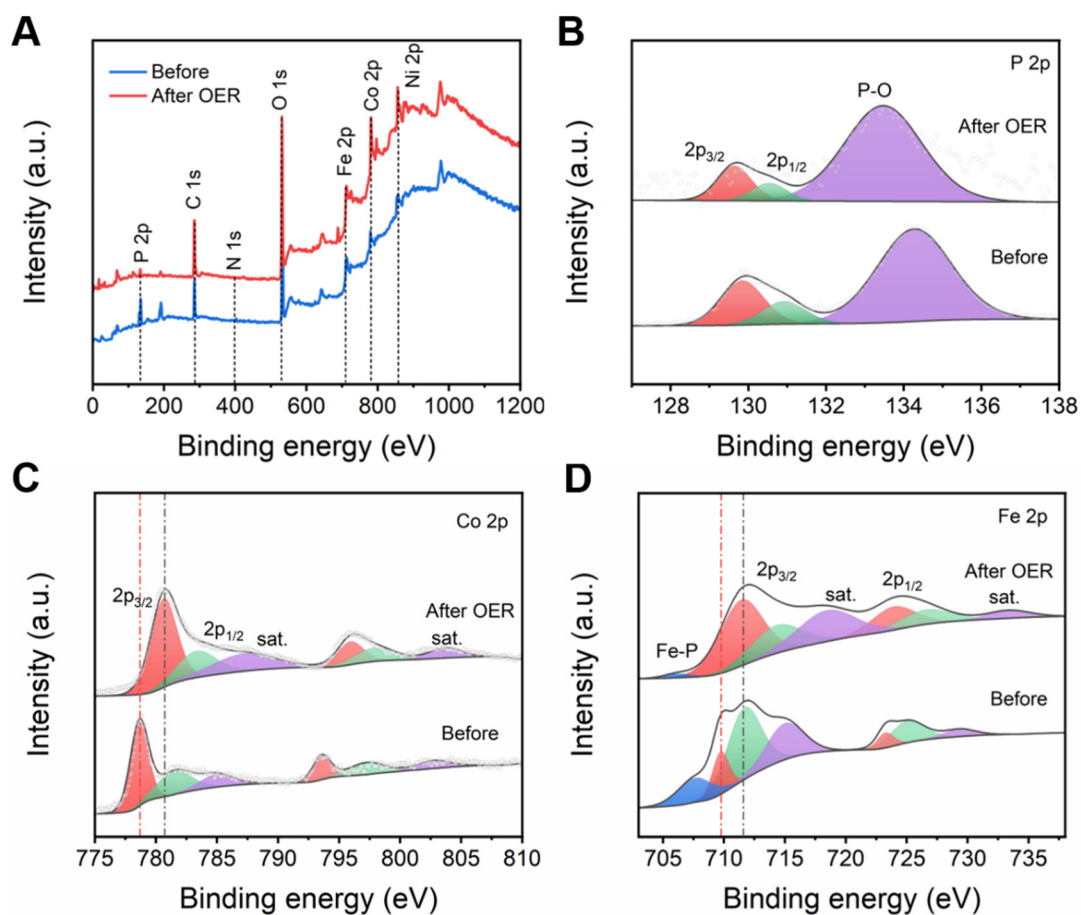

**Figure S8.** (A) XPS scanning full spectrum of Fe-Co<sub>2</sub>P/NPC/NF before and after OER stability test. (B) P 2p, (C) Co 2p and (D) Fe 2p.



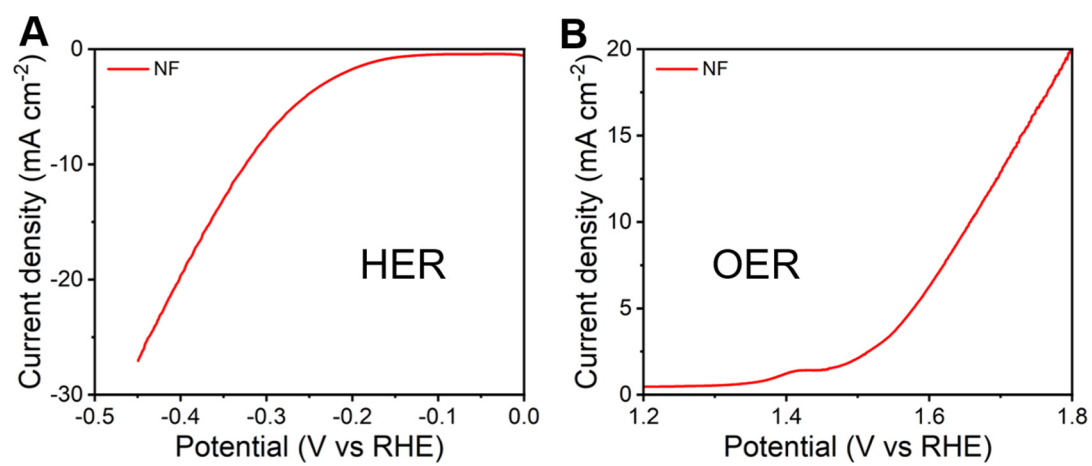

**Figure S9.** polarization curves of NF. (A) HER. (B) OER.

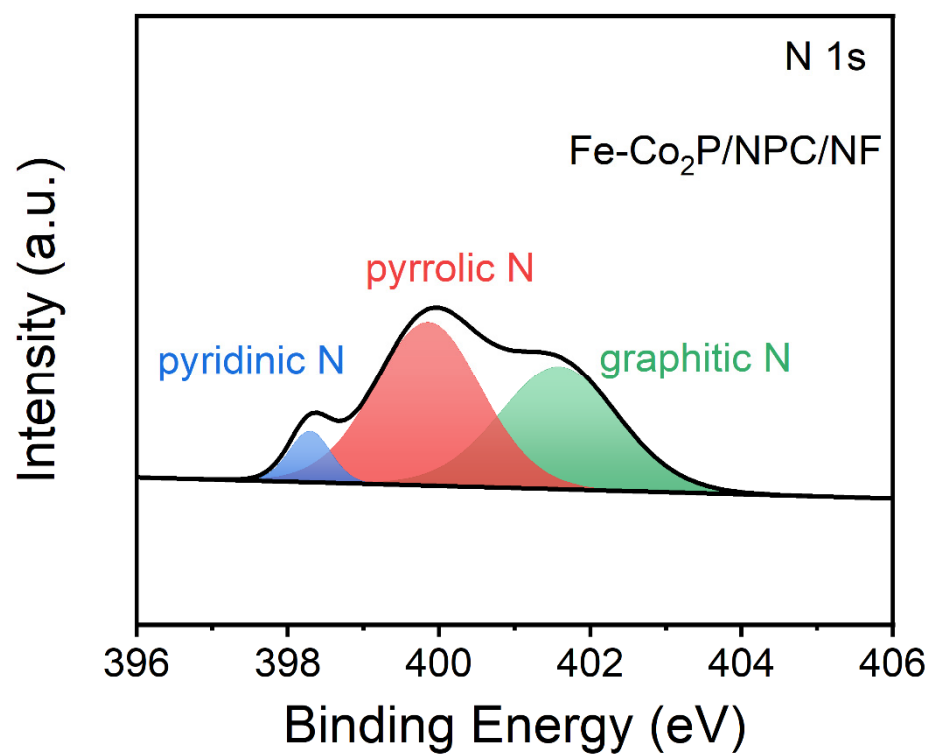

Figure S10. N 1s XPS result of Fe-Co<sub>2</sub>P/NPC/NF.

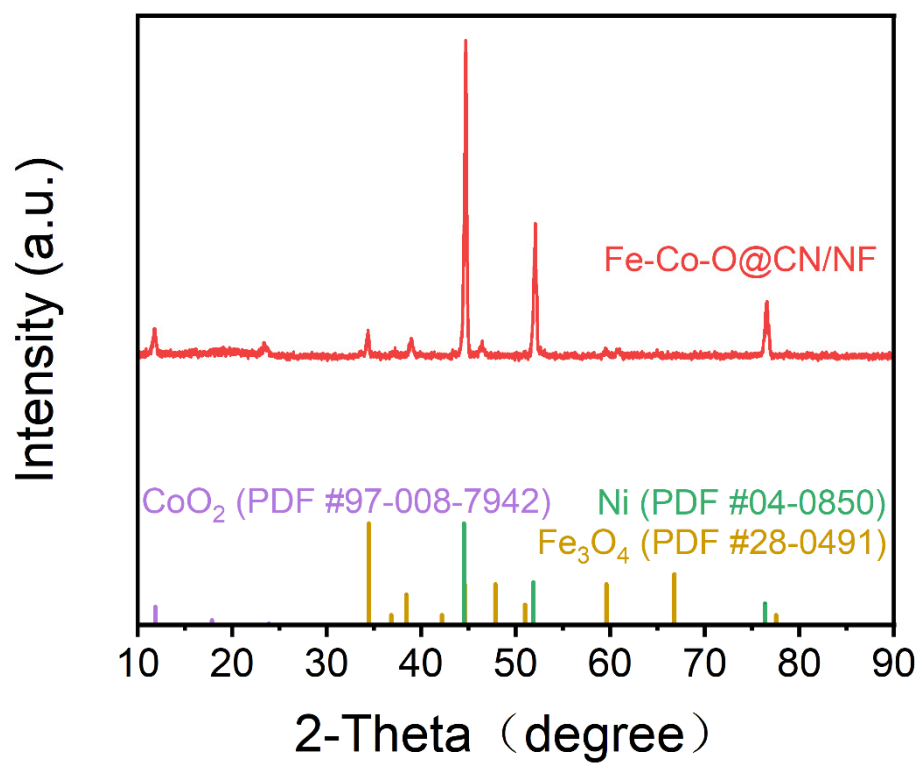

**Figure S11.** XRD patterns of Fe-Co-O@CN/NF.

**Table S1.** HER performances of different electrocatalysts in alkaline media (1 M KOH). The Fe-Co<sub>2</sub>P/NPC is superior to previously reported low-cost and Co-based HER catalysts that lack the introduction of a noble metal.

| Catalyst                                               | $\eta_{10}(\text{mV})$<br>( $j=10 \text{ mA cm}^{-2}$ ) | $\eta_{100}(\text{mV})$<br>( $j=100 \text{ mA cm}^{-2}$ ) | Tafel slope<br>( $\text{mV dec}^{-1}$ ) | Ref.             |
|--------------------------------------------------------|---------------------------------------------------------|-----------------------------------------------------------|-----------------------------------------|------------------|
| Fe-Co <sub>2</sub> P/NPC                               | 73                                                      | 185                                                       | 92.7                                    | <b>This work</b> |
| Co-P@PC                                                | 76                                                      | -                                                         | 49                                      | [46]             |
| Co <sub>x</sub> P/N-doped C                            | 187                                                     | -                                                         | 58.5                                    | [47]             |
| CoP/NCNHP                                              | 115                                                     | -                                                         | 66                                      | [48]             |
| CoP <sub>h</sub> /NG                                   | 83                                                      | -                                                         | 57                                      | [49]             |
| NiCoFeP/C                                              | 149                                                     | -                                                         | 89                                      | [50]             |
| CoFeP/CNT                                              | 178                                                     | -                                                         | 71                                      | [51]             |
| NiCo <sub>2</sub> P <sub>x</sub> /CNT                  | 47                                                      | -                                                         | 67.3                                    | [52]             |
| Co <sub>2</sub> P/Co                                   | 157                                                     | -                                                         | 59                                      | [53]             |
| Fe <sub>3</sub> O <sub>4</sub> -CoP <sub>x</sub> /TiN  | 174                                                     | -                                                         | 65                                      | [54]             |
| Co-Pi/CoP/Ti                                           | 68                                                      | -                                                         | -                                       | [55]             |
| N-CoO@CoP                                              | -                                                       | 201                                                       | 37                                      | [56]             |
| CoP-FeP                                                | 71                                                      | -                                                         | 67                                      | [57]             |
| f-CoP/CoP <sub>2</sub> /Al <sub>2</sub> O <sub>3</sub> | 138                                                     | -                                                         | 73                                      | [58]             |
| CoP-Mo <sub>2</sub> C@NC/CC                            | 74                                                      | -                                                         | 79.4                                    | [59]             |

**Table S2.** OER performances of different electrocatalysts in alkaline media (1 M KOH). The Fe-Co<sub>2</sub>P/NPC is superior to previously reported low-cost and Co-based OER catalysts that lack the introduction of a noble metal.

| Catalyst                                               | $\eta_{10}(\text{mV})$<br>( $j=10 \text{ mA cm}^{-2}$ ) | $\eta_{100}(\text{mV})$<br>( $j=100 \text{ mA cm}^{-2}$ ) | Tafel slope<br>( $\text{mVdec}^{-1}$ ) | Ref.             |
|--------------------------------------------------------|---------------------------------------------------------|-----------------------------------------------------------|----------------------------------------|------------------|
| Fe-Co <sub>2</sub> P/NPC                               | 217                                                     | 262                                                       | 38.4                                   | <b>This work</b> |
| Co-P@PC                                                | 282                                                     | -                                                         | 53                                     | [46]             |
| Co <sub>x</sub> P/N-doped C                            | 380                                                     | -                                                         | 68.1                                   | [47]             |
| CoP/NCNHP                                              | 310                                                     | -                                                         | 70                                     | [48]             |
| CoP <sub>h</sub> /NG                                   | 262                                                     | -                                                         | 54                                     | [49]             |
| NiCoFeP/C                                              | 270                                                     | -                                                         | 65                                     | [50]             |
| CoFeP/CNT                                              | 323                                                     | -                                                         | 38                                     | [51]             |
| NiCo <sub>2</sub> P <sub>x</sub> /CNT                  | 284                                                     | -                                                         | 56                                     | [52]             |
| Co <sub>2</sub> P/Co                                   | 319                                                     | -                                                         | 79                                     | [53]             |
| Fe <sub>3</sub> O <sub>4</sub> -CoP <sub>x</sub> /TiN  | 331                                                     | -                                                         | 122                                    | [54]             |
| Co-Pi/CoP/Ti                                           | 310                                                     | -                                                         | 58                                     | [55]             |
| N-CoO@CoP                                              | -                                                       | 332                                                       | 81.5                                   | [56]             |
| CoP-FeP                                                | 250                                                     | -                                                         | 131                                    | [57]             |
| f-CoP/CoP <sub>2</sub> /Al <sub>2</sub> O <sub>3</sub> | 300                                                     | -                                                         | 63                                     | [58]             |
| CoP-Mo <sub>2</sub> C@NC/CC                            | 265                                                     | -                                                         | 71.6                                   | [59]             |

**Table S3.** Overall water splitting performances of different electrocatalysts in alkaline media (1 M KOH). The Fe-Co<sub>2</sub>P/NPC is superior to previously reported low-cost and Co-based water splitting catalysts that lack the introduction of a noble metal.

| Catalyst                                               | Cell<br>voltage(V)<br>( <i>j</i> =10mA cm <sup>-2</sup> ) | Cell voltage(V)<br>( <i>j</i> =100 mA cm <sup>-2</sup> ) | Stablity<br>(h) | Ref.             |
|--------------------------------------------------------|-----------------------------------------------------------|----------------------------------------------------------|-----------------|------------------|
| Fe-Co <sub>2</sub> P/NPC                               | 1.56                                                      | 1.68                                                     | 20              | <b>This work</b> |
| Co-P@PC                                                | 1.6                                                       | -                                                        | 60              | [46]             |
| Co <sub>x</sub> P/N-doped C                            | 1.71                                                      | -                                                        | 10              | [47]             |
| CoP/NCNHP                                              | 1.64                                                      | -                                                        | 36              | [48]             |
| CoP <sub>h</sub> /NG                                   | 1.58                                                      | -                                                        | 65              | [49]             |
| NiCoFeP/C                                              | 1.60                                                      | -                                                        | 18              | [50]             |
| CoFeP/CNT                                              | 1.74                                                      | -                                                        | 20              | [51]             |
| NiCo <sub>2</sub> P <sub>x</sub> /CNT                  | 1.61                                                      | -                                                        | 48              | [52]             |
| Co <sub>2</sub> P/Co                                   | 1.71                                                      | -                                                        | 15              | [53]             |
| Fe <sub>3</sub> O <sub>4</sub> -CoP <sub>x</sub> /TiN  | 1.75                                                      | -                                                        | 11              | [54]             |
| Co-Pi/CoP/Ti                                           | 1.60                                                      | -                                                        | 24              | [55]             |
| N-CoO@CoP                                              | 1.79                                                      | -                                                        | 50              | [56]             |
| CoP-FeP                                                | 1.55                                                      | -                                                        | 24              | [57]             |
| f-CoP/CoP <sub>2</sub> /Al <sub>2</sub> O <sub>3</sub> | 1.65                                                      | -                                                        | 24              | [58]             |
| CoP-Mo <sub>2</sub> C@NC/CC                            | 1.64                                                      | -                                                        | 40              | [59]             |
